# Supplementary material for: Long-Term Exposure to Road Traffic Noise and Incident Diabetes: A Cohort Study
Source: PubMed Central journal article supplement (PMC3569689; doi:10.1289/ehp.1205503), 2012-12-10
Supplement: ehp.1205503.s001.pdf [file ehp.1205503.s001.pdf]

## **Supplemental Material**

Long-Term Exposure to Road Traffic Noise and Incident Diabetes: A Cohort Study

Mette Sørensen, Zorana J Andersen, Rikke B Nordsborg, Thomas Becker, Anne Tjønneland,

Kim Overvad, Ole Raaschou-Nielsen

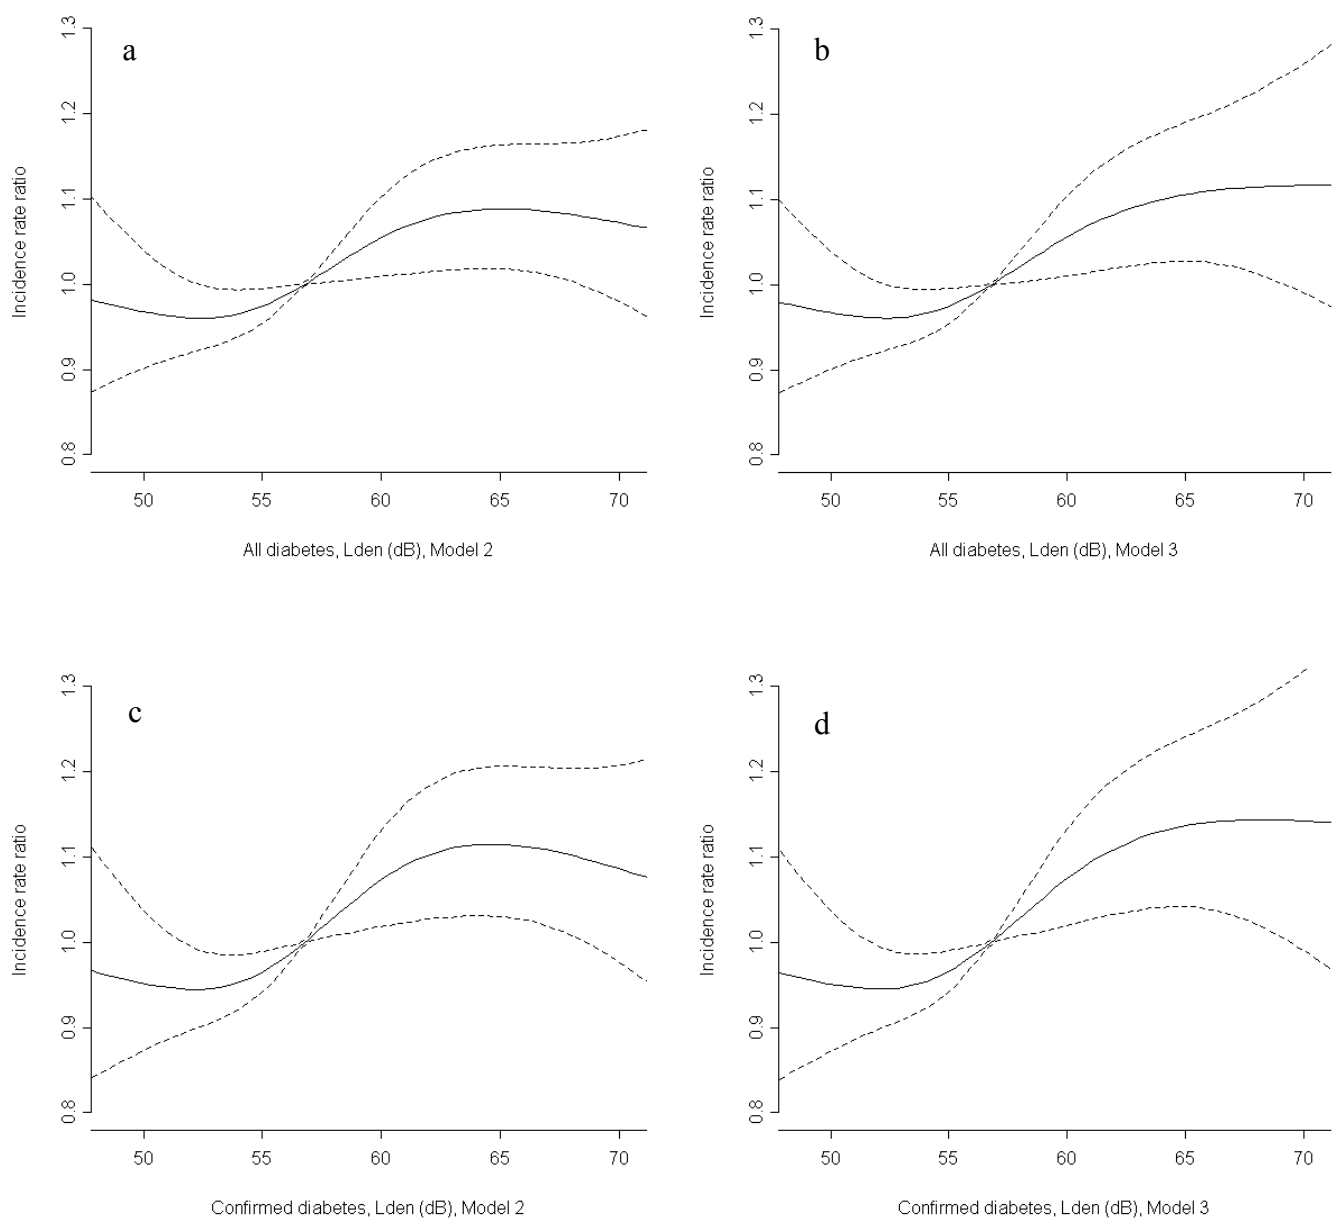

**Figure S1**

Incidence rate ratios (solid lines) with 95% confidence intervals (dashed lines) for the relation between exposure to  $L_{den}$  (year preceding diagnosis) and risk for a) and b) all incident diabetes without and with adjustment for exposure to  $NO_x$ , respectively, and c) and d) confirmed incident diabetes without and with adjustment for exposure to  $NO_x$ , respectively, all adjusted for age, sex, BMI, waist circumference, smoking status, smoking duration, smoking intensity, environmental tobacco smoke, intake of fruits, vegetables, saturated fat and alcohol, sport, bicycling and walking during leisure time, length of school attendance, occupational status, municipality SES, railway and airport noise and calendar-year.
